# Supplementary material for: Effectiveness of a long-lasting piperonyl butoxide-treated insecticidal net and indoor residual spray interventions, separately and together, against malaria transmitted by pyrethroid-resistant mosquitoes: a cluster, randomised controlled, two-by-two factorial design trial
Source: PubMed Central journal article supplement (PMC5910376; doi:10.1016/s0140-6736(18)30427-6), 2018-04-21
Supplement: mmc1.pdf [file mmc1.pdf]

# THE LANCET

## Supplementary appendix

This appendix formed part of the original submission and has been peer reviewed. We post it as supplied by the authors.

Supplement to: Protopopoff N, Mosha J F, Lukole E, et al. Effectiveness of a long-lasting piperonyl butoxide-treated insecticidal net and indoor residual spray interventions, separately and together, against malaria transmitted by pyrethroid-resistant mosquitoes: a cluster, randomised controlled, two-by-two factorial design trial. *Lancet* 2018; published online April 11. [http://dx.doi.org/10.1016/S0140-6736\(18\)30427-6](http://dx.doi.org/10.1016/S0140-6736(18)30427-6).

# Supplementary appendix

## Contents

|     |                                                                                                                                |   |
|-----|--------------------------------------------------------------------------------------------------------------------------------|---|
| 1   | Methods.....                                                                                                                   | 2 |
| 1.1 | Study area .....                                                                                                               | 2 |
| 1.2 | Per-protocol and other analyses.....                                                                                           | 3 |
| 2   | Results.....                                                                                                                   | 3 |
| 2.1 | Coverage of IRS and LLIN per arms and per survey .....                                                                         | 3 |
| 2.2 | Per-Protocol analysis result .....                                                                                             | 5 |
| 2.3 | Comparison of each individual intervention arms with control arm (standard LLIN) .....                                         | 6 |
| 2.4 | Forest plot: Factorial analysis comparing PBO LLIN vs no PBO LLIN and IRS vs no IRS on malaria infection prevalence .....      | 7 |
| 2.5 | Forest plot: Individual arm analysis comparing each intervention arms with standard LLIN on malaria infection prevalence ..... | 8 |

# 1 Methods

## 1.1 Study area

We provide the map of the study area representing each cluster with their core and buffer areas and the intervention allocated.

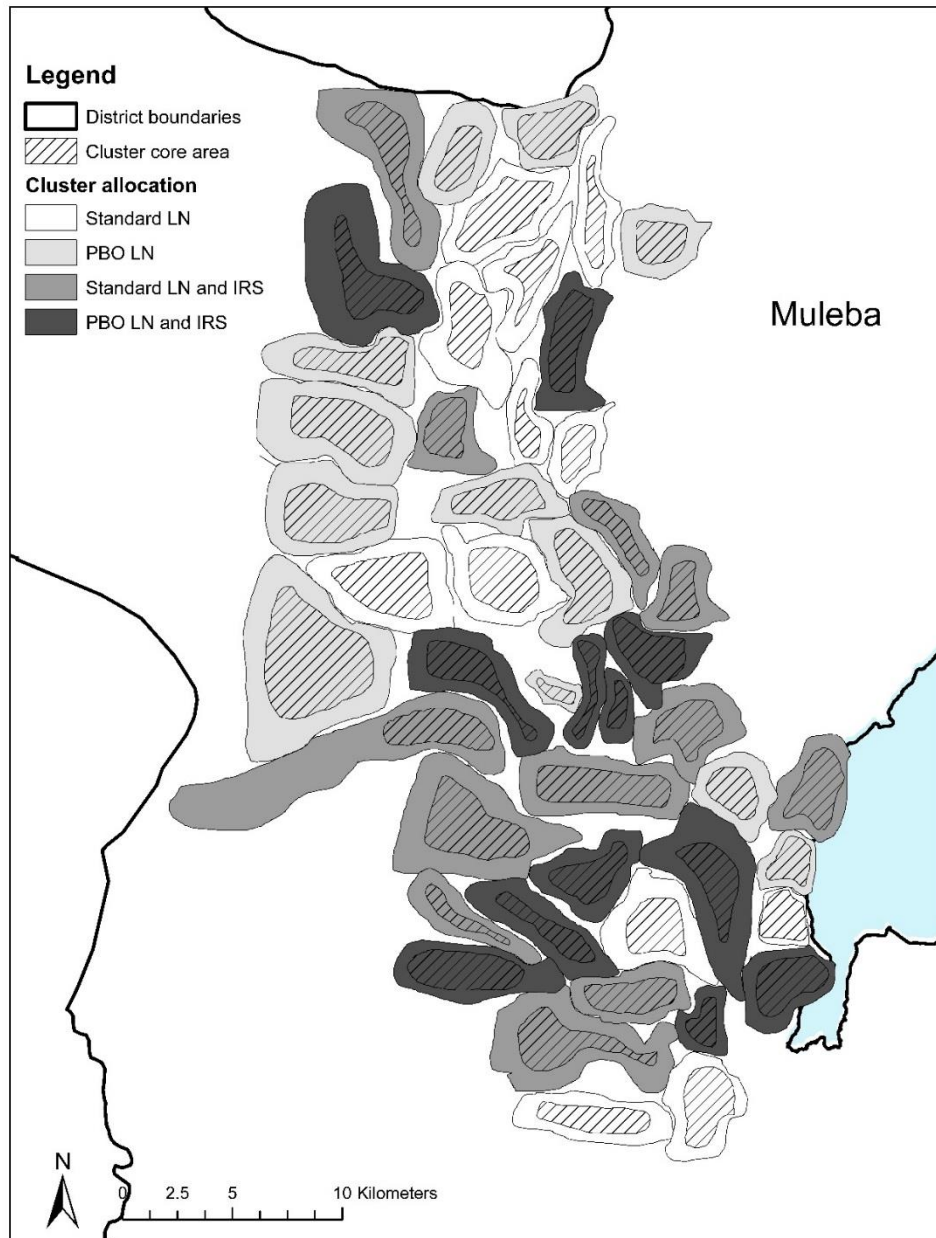

Figure S 1: Map of the study area representing each cluster with their core and buffer areas and the intervention allocated.

## 1.2 Per-protocol and other analyses

Per-protocol (PP) analysis included only those children who received and used the intended treatment and was restricted to the first-year surveys as it was difficult for householders to recall in the second year whether their house had been sprayed two years earlier. A secondary analysis examined the effect of each intervention arm (1. PBO LLIN alone, 2. Combination standard LLIN & IRS and 3. Combination PBO LLIN & IRS) compared to the reference arm (standard LLIN alone) on entomological inoculation rate, vector density, and sporozoite rate.

## **2 Results**

### 2.1 Coverage of IRS and LLIN per arms and per survey

Table S 1: Coverage of the interventions by arm.

|                                                                                    | Standard LLIN arm       | PBO LLIN arm            | Standard LLIN & IRS arm | PBO LLIN & IRS arm      |
|------------------------------------------------------------------------------------|-------------------------|-------------------------|-------------------------|-------------------------|
| Proportion of houses receiving IRS                                                 | 0.5 (0.1 - 2.0), 2/443  | 4 (0.5 - 29), 19/425    | 94 (92 - 96), 408/433   | 94 (87 - 97), 419/445   |
| Proportion of household owning at least one LLIN (any LLIN*)                       |                         |                         |                         |                         |
| 2015 Survey A, 4 months post intervention                                          | 97 (88 - 99), 427/442   | 98 (97 - 99), 419/426   | 98 (96 - 99), 416/425   | 97 (93 - 99), 428/439   |
| 2015 Survey B, 9 months                                                            | 97 (93 - 99), 414/425   | 98 (97 - 99), 398/405   | 98 (96 - 99), 420/428   | 98 (95 - 99), 403/412   |
| 2016 Survey C, 16 months                                                           | 96 (94 - 98), 452/470   | 95 (92 - 96), 449/475   | 94 (91 - 96), 446/474   | 93 (90 - 95), 408/439   |
| 2016 SurveyD, 21 months                                                            | 94 (90 - 96), 437/467   | 92 (87 - 95), 422/460   | 93 (86 - 97), 418/449   | 90 (85 - 93), 416/463   |
| Propotion of households with adequate LLIN (any LLIN*) per sleeping place (access) |                         |                         |                         |                         |
| 2015 Survey A, 4 months                                                            | 88 (83 - 93), 389/440   | 91 (87 - 94), 387/426   | 91 (86 - 94), 385/425   | 89 (82 - 93), 389/439   |
| 2015 Survey B, 9 months                                                            | 91 (88 - 93), 386/424   | 88 (83 - 92), 358/405   | 91 (88 - 94), 390/427   | 87 (82 - 91), 359/411   |
| 2016 Survey C, 16 months                                                           | 80 (75 - 84), 375/470   | 70 (65 - 74), 332/474   | 76 (72 - 80), 362/474   | 71 (63 - 77), 311/439   |
| 2016 SurveyD, 21 months                                                            | 72 (67 - 76), 337/467   | 69 (62 - 75), 318/460   | 72 (64 - 79), 323/449   | 68 (60 - 74), 313/463   |
| Proportion of resident declaring to use a LLIN (any LLIN*) the previous night      |                         |                         |                         |                         |
| 2015 Survey A, 4 months                                                            | 75 (66 - 82), 1915/2567 | 78 (73 - 82), 1997/2559 | 76 (67 - 83), 1893/2493 | 79 (72 - 85), 2002/2533 |
| 2015 Survey B, 9 months                                                            | 80 (75 - 85), 2012/2510 | 78 (73 - 82), 1820/2335 | 76 (70 - 80), 1761/2333 | 77 (70 - 83), 1941/2522 |
| 2016 Survey C, 16 months                                                           | 68 (59 - 76), 1818/2669 | 58 (51 - 65), 1571/2687 | 61 (56 - 67), 1629/2652 | 62 (55 - 69), 1580/2546 |
| 2016 SurveyD, 21 months                                                            | 62 (57 - 67), 1610/2595 | 54 (47 - 62), 1445/2647 | 53 (43 - 63), 1368/2570 | 54 (46 - 62), 1482/2739 |
| Proportion of study LLIN (study LLIN/any LLIN*)                                    |                         |                         |                         |                         |
| 2015 Survey A, 4 months                                                            | 92 (89 - 94), 1219/1329 | 93 (89 - 95), 1241/1337 | 95 (91 - 97), 1175/1241 | 94 (91 - 96), 1214/1291 |
| 2015 Survey B, 9 months                                                            | 95 (92 - 97), 1144/1199 | 94 (91 - 96), 1043/1110 | 93 (90 - 95), 1042/1122 | 93 (89 - 96), 1132/1216 |
| 2016 Survey C, 16 months                                                           | 92 (89 - 94), 1034/1126 | 91 (86 - 94), 981/1081  | 90 (85 - 94), 1018/1131 | 90 (84 - 94), 913/1013  |
| 2016 SurveyD, 21 months                                                            | 82 (77 - 85), 844/1025  | 77 (71 - 82), 785/1021  | 79 (73 - 83), 789/1004  | 69 (61 - 76), 771/1122  |

\* Any LN include study LLIN and other LLIN

Results are expressed in proportion with (95%CI) and absolute number n/N. N is total household number for IRS, LLIN ownership and LLIN access and total number of resident for usage.

## 2.2 Per-Protocol analysis result

Table S 2: Per-protocol analysis Plasmodium infection prevalence and anaemia by intervention (PBO LLIN vs No PBO LLIN and IRS vs No IRS), 4 and 9 months post intervention.

|                                                   | Plasmodium infection prevalence |      |      |             |         | Anaemia prevalence under 5 |     |       |             |         |
|---------------------------------------------------|---------------------------------|------|------|-------------|---------|----------------------------|-----|-------|-------------|---------|
|                                                   | n/N                             | %    | OR   | 95%CI       | P-value | n/N                        | %   | OR    | 95%CI       | P-value |
| <b>Survey A, 2015, 4 months post intervention</b> |                                 |      |      |             |         |                            |     |       |             |         |
| No PBO LLIN <sup>1</sup>                          | 618/1316                        | 47.0 | 1    |             |         | 20/448                     | 4.5 | 1     |             |         |
| PBO LLIN <sup>2</sup>                             | 546/1329                        | 41.1 | 0.63 | 0.36 - 1.13 | 0.1190  | 11/483                     | 2.3 | 0.49  | 0.15-1.52   | 0.2105  |
| No IRS <sup>3</sup>                               | 670/1329                        | 50.4 | 1    |             |         | 19/470                     | 4.0 | 1     |             |         |
| IRS <sup>4</sup>                                  | 494/1316                        | 37.5 | 0.47 | 0.27 - 0.83 | 0.0099  | 12/461                     | 2.6 | 0.61  | 0.21-1.77   | 0.3579  |
| Interaction coefficient                           |                                 |      | 1.56 | 0.73-3.33   | 0.2435  |                            |     | 1.01  | 0.18-5.80   | 0.9864  |
| <b>Survey B, 2015, 9 months post intervention</b> |                                 |      |      |             |         |                            |     |       |             |         |
| No PBO LLIN <sup>1</sup>                          | 535/1223                        | 43.7 | 1    |             |         | 11/383                     | 2.9 | 1     |             |         |
| PBO LLIN <sup>2</sup>                             | 341/1202                        | 28.4 | 0.31 | 0.18 - 0.53 | 0.0001  | 5/399                      | 1.3 | 0.23  | 0.06-0.86   | 0.0292  |
| No IRS <sup>3</sup>                               | 562/1272                        | 44.2 | 1    |             |         | 13/404                     | 3.2 | 1     |             |         |
| IRS <sup>4</sup>                                  | 314/1153                        | 27.2 | 0.28 | 0.16 - 0.47 | <0.0001 | 3/378                      | 0.8 | 0.08  | 0.01-0.62   | 0.0159  |
| Interaction coefficient                           |                                 |      | 3.03 | 1.46-6.29   | 0.0037  |                            |     | 10.12 | 0.74-137.92 | 0.0811  |

Per-protocol analysis restricted to individuals receiving and using the allocated interventions in each arm in year 2015. Data presented are n/N (%) and 95%CI. OR compared the two-main intervention effect 1/PBO LLIN vs No PBO LLIN and 2/IRS vs no IRS and their interaction. OR unadjusted for baseline plasmodium infection prevalence or anaemia prevalence. Plasmodium infection prevalence is reported for children 6 months to 14 years and prevalence of moderate to severe anaemia in children under 5 years old with haemoglobin level <8g/dl.

<sup>1</sup>Standard LLIN and standard LLIN & IRS arms, <sup>2</sup> PBO LLIN and PBO LLIN & IRS arms, <sup>3</sup> standard LLIN and PBO LLIN arms, <sup>4</sup> standard LLIN & IRS and PBO LLIN & IRS arms.

### 2.3 Comparison of each individual intervention arms with control arm (standard LLIN)

Table S 3: Mean vector density per night per household, sporozoite rate, and entomological inoculation rate per month per household by study arms during the first year and second year post intervention.

|                       | <u>Vector density per night per household</u> |       |      |           |         | <u>Sporozoite rate</u> |      |       |           |         | <u>EIR per month per household</u> |       |      |            |         |
|-----------------------|-----------------------------------------------|-------|------|-----------|---------|------------------------|------|-------|-----------|---------|------------------------------------|-------|------|------------|---------|
|                       | N                                             | Mean  | DR   | 95%CI     | P-value | n/N                    | %    | OR    | 95%CI     | P-value | N                                  | Mean* | DR*  | 95%CI      | P-value |
| <b>Year 1: 2015</b>   |                                               |       |      |           |         |                        |      |       |           |         |                                    |       |      |            |         |
| Standard LN arm       | 471                                           | 2.83  | 1    |           |         | 19/683                 | 2.8% | 1     |           |         | 449                                | 1.76  | 1    |            |         |
| PBO LN arm            | 468                                           | 1.84  | 0.33 | 0.16-0.69 | 0.0038  | 2/305                  | 0.7% | 0.247 | 0.07-0.88 | 0.03171 | 452                                | 0.26  | 0.13 | 0.03-0.53  | 0.0055  |
| Standard LN & IRS arm | 425                                           | 2.37  | 0.63 | 0.27-1.43 | 0.2652  | 1/269                  | 0.4% | 0.149 | 0.02-1.02 | 0.05194 | 413                                | 0.05  | 0.03 | 0.004-0.24 | 0.0014  |
| PBO LN & IRS arm      | 493                                           | 1.853 | 0.28 | 0.13-0.60 | 0.0016  | 0/343                  | 0.0% | -     |           |         | 459                                | 0.00  | -    |            |         |
| <b>Year 2: 2016</b>   |                                               |       |      |           |         |                        |      |       |           |         |                                    |       |      |            |         |
| Standard LN arm       | 966                                           | 3.04  | 1    |           |         | 50/1268                | 3.9% | 1     |           |         | 881                                | 1.65  | 1    |            |         |
| PBO LN arm            | 976                                           | 2.6   | 0.4  | 0.20-0.80 | 0.0101  | 14/939                 | 1.5% | 0.38  | 0.15-0.92 | 0.0331  | 920                                | 0.43  | 0.33 | 0.13-0.83  | 0.0189  |
| Standard LN & IRS arm | 980                                           | 4.15  | 0.93 | 0.47-1.85 | 0.8309  | 30/968                 | 3.1% | 0.81  | 0.37-1.78 | 0.589   | 912                                | 0.78  | 0.48 | 0.25-0.94  | 0.034   |
| PBO LN & IRS arm      | 977                                           | 2.76  | 0.37 | 0.22-0.65 | 0.0008  | 13/992                 | 1.3% | 0.34  | 0.13-0.90 | 0.0309  | 925                                | 0.35  | 0.22 | 0.11-0.45  | 0.0001  |

\*Mean and DR accounting for sampling weight

## 2.4 Forest plot: Factorial analysis comparing PBO LLIN vs no PBO LLIN and IRS vs no IRS on malaria infection prevalence

Figure S 2: Forest plot for the factorial analysis including the protective efficacy (PE=1-malaria prevalence ratio) between intervention arms and reference arms), the OR and 95%CI, 4, 9, 16 and 21 months post intervention.

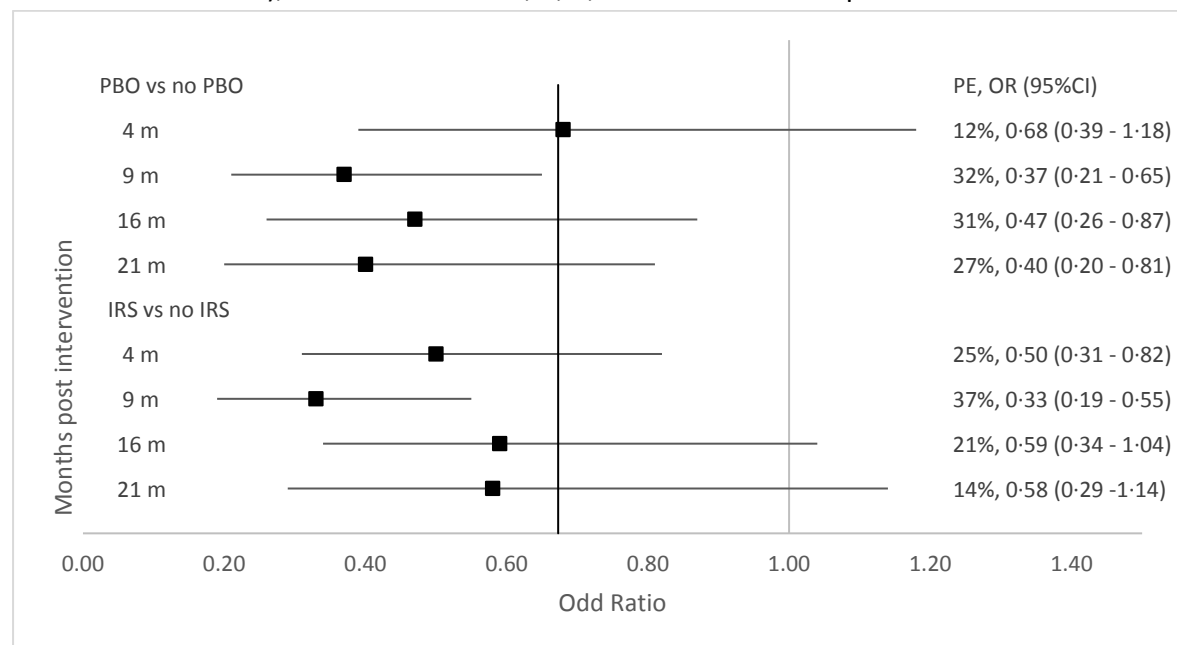

The prevalence ratios of 0.72 (28% reduction) and a baseline prevalence of 20% in the reference arm as pre- specified in the sample size calculation, translates to odds ratio of 0.673. This OR is represented by the vertical black line.



2.5 Forest plot: Individual arm analysis comparing each intervention arms with standard LLIN on malaria infection prevalence

Figure S 3: Forest plot for the comparison of each intervention to the control arm (standard LLIN) including the protective efficacy (PE), the OR and 95%CI, 4, 9, 16 and 21 months post intervention.

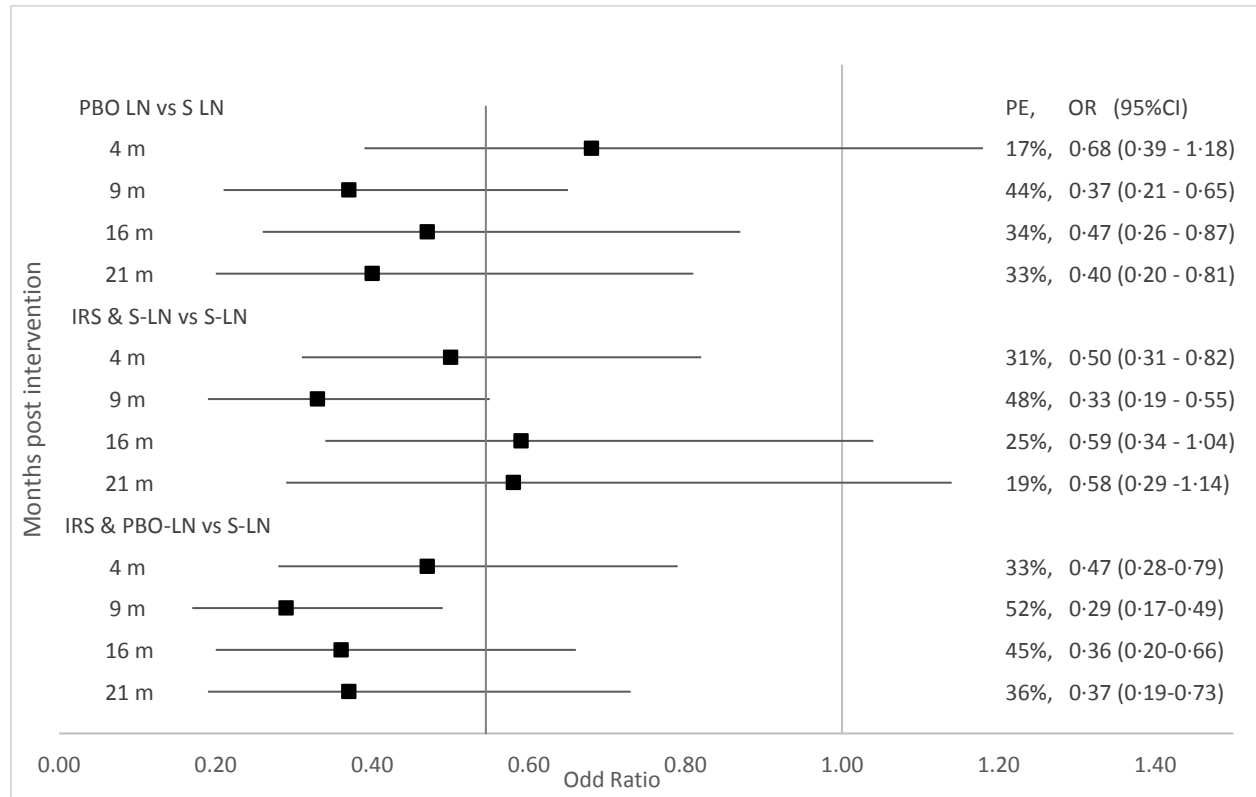

The prevalence ratios of 0.60 (40% reduction) with a baseline prevalence of 20% in the reference arm as pre-specified in the sample size calculation, translates to odds ratio of 0.545. This OR is represented by the vertical black line.
